# Supplementary material
Source: PubMed Central journal article supplement (PMC5752837)
Supplement: cr2017132x8.pdf [file cr2017132x8.pdf]

## Supplementary information, Figure S8

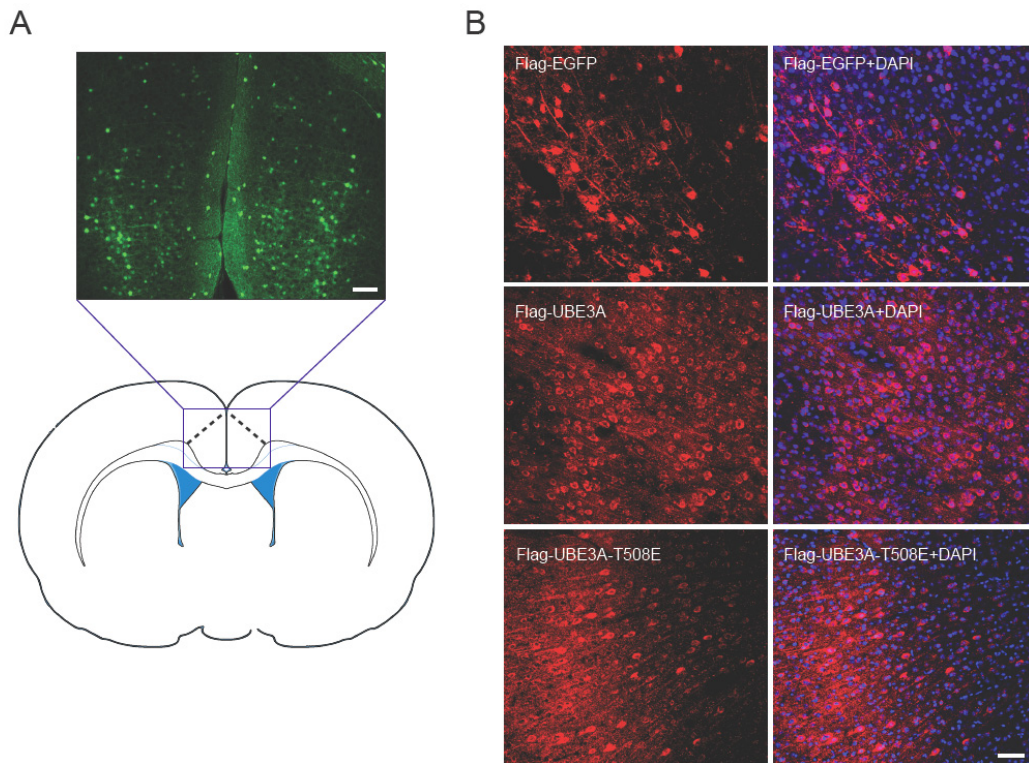

**Figure S8 Stereotaxic injection of indicated AAVs into mouse PFC regions. (A)** Representative image of mouse brain coronal slice showed the bilateral injection of AAV-SynI-Flag-EGFP virus into medial PFC region. Scale bar, 100  $\mu\text{m}$ . **(B)** Visualization of Flag-tagged EGFP, UBE3A or UBE3AT508E mutant proteins in medial PFC regions. Slices were subjected to immunostaining with anti-Flag and subsequently Cy3-conjugated secondary antibodies, followed by fluorescence microscopy analyses. The Flag-tagged proteins were shown in red, and the cell nucleus stained with DAPI. Scale bar, 50  $\mu\text{m}$ .
