# Supplementary material
Source: PubMed Central journal article supplement (PMC5752837)
Supplement: cr2017132x10.pdf [file cr2017132x10.pdf]

## Supplementary information, Figure S10

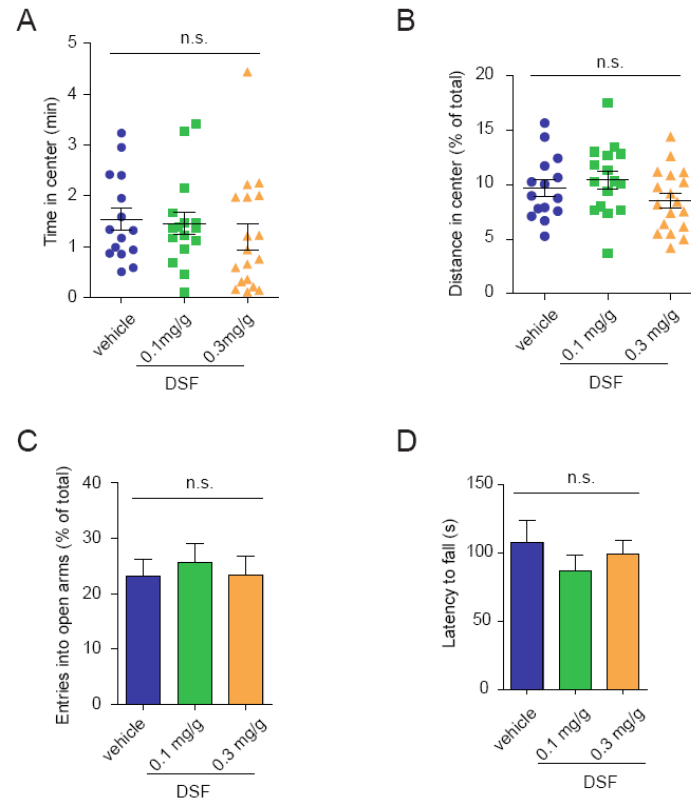

**Figure S10 Administration with disulfiram did not alter the mouse behaviors in open-field, elevated plus maze or rotarod tests. (A, B)** In open-field test, time spent in center (A) and the percentages of distances traveled in center within total distances (B) were compared among the indicated groups. (C) In elevated plus maze test, the percentages of entries into open arms within total entries was calculated and compared among the indicated groups. (D) In rotarod test, latencies to fall were recorded and compared among the indicated groups. n.s., not significant (one-way ANOVA, with Bonferroni *post-hoc* test); n = 15-19.
