# Supplementary material
Source: PubMed Central journal article supplement (PMC5752837)
Supplement: cr2017132x11.pdf [file cr2017132x11.pdf]

## Supplementary information, Table S1

**Table S1 Methylation analysis of *SNRPN* gene in ASD patients with 15q11-13 duplication.**

| sampleID | TA-cloneID | CpG island methylation status (loci number) |   |   |   |   |   |   |   |   |    |    |    |    |    |    |    |    |    |    |    |    |    |    |    |
|----------|------------|---------------------------------------------|---|---|---|---|---|---|---|---|----|----|----|----|----|----|----|----|----|----|----|----|----|----|----|
|          |            | 1                                           | 2 | 3 | 4 | 5 | 6 | 7 | 8 | 9 | 10 | 11 | 12 | 13 | 14 | 15 | 16 | 17 | 18 | 19 | 20 | 21 | 22 | 23 | 24 |
| A01      | 1          | +                                           | + | + | + | + | + | + | + | + | +  | +  | +  | +  | +  | +  | +  | +  | +  | +  | +  | +  | +  | +  | +  |
|          | 2          | +                                           | + | + | + | + | + | + | - | + | +  | +  | +  | +  | +  | +  | +  | +  | +  | +  | +  | +  | +  | +  | +  |
|          | 3          | +                                           | + | + | + | + | + | + | + | + | +  | +  | +  | +  | +  | +  | +  | +  | +  | +  | +  | -  | +  | +  | +  |
|          | 4          | +                                           | + | + | - | + | + | + | + | + | +  | -  | -  | -  | -  | -  | -  | -  | -  | -  | -  | -  | -  | -  | +  |
|          | 5          | +                                           | + | + | - | + | + | + | + | + | +  | +  | +  | -  | +  | +  | +  | +  | +  | -  | +  | +  | -  | -  | -  |
|          | 6          | +                                           | + | + | + | + | + | + | + | + | +  | +  | +  | +  | +  | +  | +  | +  | +  | +  | +  | +  | +  | +  | +  |
|          | 7          | -                                           | - | - | - | - | - | - | - | - | -  | -  | -  | -  | -  | -  | -  | -  | -  | -  | -  | -  | -  | -  | +  |
|          | 8          | +                                           | + | + | - | + | + | + | + | + | +  | +  | +  | +  | +  | +  | +  | +  | +  | +  | +  | +  | +  | +  | +  |
|          | 9          | +                                           | + | + | + | + | + | + | - | + | +  | +  | +  | +  | +  | +  | +  | +  | +  | +  | +  | +  | +  | +  | +  |
|          | 10         | -                                           | - | - | - | - | - | - | - | - | -  | -  | -  | -  | -  | -  | -  | -  | -  | -  | -  | -  | -  | -  | +  |
| A02      | 1          | +                                           | + | + | + | + | + | + | + | + | +  | +  | +  | +  | +  | +  | +  | +  | +  | +  | -  | +  | +  | +  |    |
|          | 2          | +                                           | + | + | + | + | + | + | + | + | +  | +  | +  | +  | +  | +  | +  | +  | +  | +  | +  | +  | +  | +  |    |
|          | 3          | +                                           | + | + | + | + | + | + | + | + | +  | +  | +  | +  | +  | +  | +  | +  | +  | +  | +  | +  | +  | +  |    |
|          | 4          | +                                           | + | + | + | + | + | + | + | + | +  | +  | +  | +  | +  | +  | +  | +  | +  | +  | +  | +  | +  | +  |    |
|          | 5          | +                                           | + | + | + | + | + | + | + | + | +  | +  | +  | +  | +  | +  | +  | +  | +  | +  | +  | +  | +  | +  |    |
|          | 6          | +                                           | + | + | + | + | + | + | + | + | +  | +  | +  | +  | +  | +  | +  | +  | +  | +  | +  | +  | +  | +  |    |
|          | 7          | +                                           | + | + | + | + | + | + | + | + | +  | +  | +  | +  | +  | +  | +  | +  | +  | +  | +  | +  | +  | +  |    |
|          | 8          | +                                           | - | + | + | + | + | + | + | + | +  | +  | +  | +  | +  | +  | +  | +  | +  | +  | -  | +  | +  | +  |    |
|          | 9          | +                                           | + | + | + | + | + | + | + | + | +  | +  | +  | +  | +  | +  | +  | +  | +  | +  | +  | +  | +  | +  |    |
|          | 10         | +                                           | + | + | + | + | + | + | + | + | +  | +  | +  | +  | +  | +  | +  | +  | +  | +  | +  | +  | +  | +  |    |

Methylation status (containing 24 CpG sites) was analyzed in *SNRPN* gene from ASD patients using bisulfite DNA sequencing method and exhibited maternal duplication pattern. +, represented methylated; -, represented unmethylated.
