# Supplementary material
Source: PubMed Central journal article supplement (PMC5752837)
Supplement: cr2017132x12.pdf [file cr2017132x12.pdf]

## Supplementary information, Table S2

**Table S2 Plasmids used in this study.**

| Plasmid name                                                   | Construction method       | Usage                         |
|----------------------------------------------------------------|---------------------------|-------------------------------|
| pDEST32-UBE3A                                                  | LR reaction               | Yeast 2-hybrid                |
| pDEST22-ALDH1A2                                                | LR reaction               | Yeast 2-hybrid                |
| pCDH-Flag-UBE3A (Full length)                                  | Traditional cloning       | Co-IP, IF                     |
| pCDH-Flag-UBE3A (isoform 1)                                    | Traditional cloning       | IF                            |
| pCDH-Flag-UBE3A (isoform 3)                                    | Traditional cloning       | IF                            |
| pcDNA3.1-5'-Myc-UBE3A                                          | Traditional cloning       | In vivo ubiquitylation        |
| pcDNA3.1-5'-Myc-UBE3A (isoform 1)                              | Traditional cloning       | In vivo ubiquitylation        |
| pcDNA3.1-5'-Myc-UBE3A (isoform 3)                              | Traditional cloning       | In vivo ubiquitylation        |
| pcDNA3.1-5'-Myc-UBE3A-T508A                                    | Site-directed mutagenesis | In vivo ubiquitylation        |
| pcDNA3.1-5'-Myc-UBE3A-T508E                                    | Site-directed mutagenesis | In vivo ubiquitylation        |
| pcDNA3.0-ALDH1A2-HA                                            | Traditional cloning       | Co-IP, in vivo ubiquitylation |
| pcDNA3.0-ALDH1A1-HA                                            | Traditional cloning       | Co-IP, in vivo ubiquitylation |
| pcDNA3.0-ALDH1A3-HA                                            | Traditional cloning       | Co-IP, in vivo ubiquitylation |
| pcDNA3.0-ALDH1A2-K269/370/415R-HA                              | Site-directed mutagenesis | In vivo ubiquitylation        |
| pcDNA3.0-ALDH1A2-Flag                                          | Traditional cloning       | IP                            |
| pcDNA3.0-ALDH1A2-RFP                                           | Traditional cloning       | IF                            |
| pET28a-ALDH1A2-His6                                            | Traditional cloning       | GST pulldown                  |
| pET28a-ALDH1A1-His6                                            | Traditional cloning       | GST pulldown                  |
| pET28a-ALDH1A3-His6                                            | Traditional cloning       | GST pulldown                  |
| pET22b-ALDH1A2-His6                                            | Traditional cloning       | in vitro ubiquitylation       |
| pET22b-ALDH1A1-His6                                            | Traditional cloning       | in vitro ubiquitylation       |
| pET22b-ALDH1A3-His6                                            | Traditional cloning       | in vitro ubiquitylation       |
| pGEX4T-1-GST-E6AP                                              | Traditional cloning       | GST pulldown                  |
| pGEX4T-1-GST-E6AP-1-280                                        | Traditional cloning       | GST pulldown                  |
| pGEX4T-1-GST-E6AP-281-505                                      | Traditional cloning       | GST pulldown                  |
| pGEX4T-1-GST-E6AP-506-875                                      | Traditional cloning       | GST pulldown                  |
| pGEX4T-1-GST-E6AP-281-875                                      | Traditional cloning       | GST pulldown                  |
| pACYC-HA-UB-UBCH7-Uba1-UBE3A                                   | Traditional cloning       | In vitro ubiquitylation       |
| pACYC-HA-UB-UBCH7-Uba1                                         | Traditional cloning       | In vitro ubiquitylation       |
| pRK5-His6-UB ( <a href="#">modified from Addgene # 17608</a> ) | Traditional cloning       | In vivo ubiquitylation        |
| pRK5-His6-UB-K6                                                | Site-directed mutagenesis | In vivo ubiquitylation        |
| pRK5-His6-UB-K11                                               | Site-directed mutagenesis | In vivo ubiquitylation        |
| pRK5-His6-UB-K27                                               | Site-directed mutagenesis | In vivo ubiquitylation        |
| pRK5-His6-UB-K29                                               | Site-directed mutagenesis | In vivo ubiquitylation        |

|                                                                |                           |                           |
|----------------------------------------------------------------|---------------------------|---------------------------|
| pRK5-His6-UB-K33                                               | Site-directed mutagenesis | In vivo ubiquitylation    |
| pRK5-His6-UB-K48                                               | Site-directed mutagenesis | In vivo ubiquitylation    |
| pRK5-His6-UB-K63                                               | Site-directed mutagenesis | In vivo ubiquitylation    |
| pRK5-His6-UB-K29R                                              | Site-directed mutagenesis | In vivo ubiquitylation    |
| pRK5-His6-UB-K63R                                              | Site-directed mutagenesis | In vivo ubiquitylation    |
| pLenti-sgUBE3A-Cas9 (vector: <a href="#">Addgene # 52961</a> ) | Traditional cloning       | CRISPR-Cas9               |
| pGL4.22-RARE-TK-Luciferase                                     | Gibson assembly           | Luciferase activity assay |
| pCDH-RARE-TK-hrGFP                                             | Gibson assembly           | IF                        |
| pCDH-turboRFP                                                  | Traditional cloning       | IF                        |
| pCDH-Flag-UBE3A-IRES-turboRFP                                  | Gibson assembly           | IF                        |
| pCDH-Flag-UBE3A-T508E-IRES-turboRFP                            | Gibson assembly           | IF                        |
| pAAV-hSyn-3XFlag-UBE3A                                         | Traditional cloning       | AAV                       |
| pAAV-hSyn-3XFlag-UBE3A-T508E                                   | Traditional cloning       | AAV                       |
| pAAV-hSyn-3XFlag-EGFP                                          | Traditional cloning       | AAV                       |
