# Supplementary material
Source: PubMed Central journal article supplement (PMC5752837)
Supplement: cr2017132x13.pdf [file cr2017132x13.pdf]

## Supplementary information, Table S3

Table S3 qRT-PCR primers used in this study.

| Target gene  | Forward primer (5'->3') | Reverse primer (5'->3') |
|--------------|-------------------------|-------------------------|
| <i>Gapdh</i> | AGGTCGGTGTGAACGGATTG    | GGGGTCGTTGATGGCAACA     |
| <i>GluR1</i> | AACCACCGAGGAAGGATACC    | CGTTGAGGCGTTCTGATTCA    |
| <i>GluR2</i> | TTCTCCTGTTTTATGGGGACTGA | CCCTACCCGAAATGCACTGTA   |
